# Supplementary material for: Deep convolutional neural networks for segmenting 3D in vivo multiphoton images of vasculature in Alzheimer disease mouse models
Source: PubMed Central journal article supplement (PMC6415838; doi:10.1371/journal.pone.0213539), 2019-03-13
Supplement: pone.0213539.s004.pdf [file pone.0213539.s004.pdf]

**S1 Table. The results of investigating different field of view sizes.**

|    | <i>Architecture</i>           | <i>FOV</i> |
|----|-------------------------------|------------|
| N1 | C 7x7x5 - P - C 5x5 - P - NN  | 33x33x5    |
| N2 | C 7x7x9 - P - C 5x5 - P - NN  | 33x33x9    |
| N3 | C 7x7x15 - P - C 5x5 - P - NN | 33x33x15   |
| N4 | C 7x7x31 - P - C 5x5 - P - NN | 33x33x31   |
| N5 | C 7x7x5 - P - C 5x5 - P - NN  | 85x85x5    |
| N6 | C 7x7x7 - P - C 5x5 - P - NN  | 25x25x7    |
| N7 | C 7x7x7 - P - C 5x5 - P - NN  | 33x33x7    |
| N8 | C 7x7x7 - P - C 5x5 - P - NN  | 41x41x7    |
| N9 | C 9x9x9 - P - C 5x5 - P - NN  | 41x41x9    |

|    | <i>Sensitivity</i> | <i>Specificity</i> | <i>Dice</i> | <i>Jaccard</i> | <i>MHD</i> |
|----|--------------------|--------------------|-------------|----------------|------------|
| N1 | 93.10%             | 98.15%             | 87.11%      | 77.17%         | 1.38       |
| N2 | 87.39%             | 98.87%             | 87.40%      | 77.62%         | 1.15       |
| N3 | 91.69%             | 98.31%             | 87.09%      | 77.13%         | 1.61       |
| N4 | 89.94%             | 98.21%             | 85.69%      | 74.96%         | 2.19       |
| N5 | 91.15%             | 98.23%             | 86.43%      | 76.11%         | 1.46       |
| N6 | 90.22%             | 98.61%             | 87.71%      | 78.11%         | 1.03       |
| N7 | 91.57%             | 98.49%             | 87.89%      | 78.40%         | 1.20       |
| N8 | 91.01%             | 98.34%             | 86.86%      | 76.77%         | 1.85       |
| N9 | 93.23%             | 97.61%             | 84.81%      | 73.63%         | 2.38       |
