# Supplementary material for: Deep convolutional neural networks for segmenting 3D in vivo multiphoton images of vasculature in Alzheimer disease mouse models
Source: PubMed Central journal article supplement (PMC6415838; doi:10.1371/journal.pone.0213539), 2019-03-13
Supplement: pone.0213539.s005.pdf [file pone.0213539.s005.pdf]

**S2 Table. The results of investigating different architectures.**

|      | <i>Architecture</i>                | <i>FOV</i> |
|------|------------------------------------|------------|
| N10  | C 7x7x7 - P - C 5x5 - P - 2*NN     | 33x33x7    |
| N11  | 3*C 3x3x3 - P - 3*C 3x3 - P - NN   | 33x33x7    |
| N12  | 4*C 5x5x5 - P - 3*C 5x5 - P - NN   | 41x41x9    |
| N13  | 4*C 3x3x3 - P - 3*C 3x3 - P - NN   | 41x41x9    |
| N14  | C 7x7x7 - P - C 5x5x5 - P - NN     | 25x25x25   |
| N15  | 3*C 3x3x3 - P - 2*C 3x3x3 - P - NN | 33x33x33   |
| N16  | 3*C 3x3x3 - P - 2*C 3x3 - P - NN   | 41x41x41   |
| N17  | 3*C 3x3x3 - P - 2*C 3x3 - P - NN   | 31x31x31   |
| N18  | 3*C 3x3x3 - P - 2*C 3x3 - P - NN   | 49x49x49   |
| N19  | 3*C 3x3x3 - P - 2*C 3x3 - P - NN   | 33x33x7    |
| N20  | previous architecture for ROI 5x5  | 33x33x7    |
| N20P | previous architecture+post proc.   | 33x33x7    |

|      | <i>Sensitivity</i> | <i>Specificity</i> | <i>Dice</i> | <i>Jaccard</i> | <i>MHD</i> |
|------|--------------------|--------------------|-------------|----------------|------------|
| N10  | 89.61%             | 98.33%             | 86.06%      | 75.53%         | 1.63       |
| N11  | 93.71%             | 97.83%             | 86.00%      | 75.44%         | 1.87       |
| N12  | 83.78%             | 98.68%             | 84.43%      | 73.05%         | 1.82       |
| N13  | 93.45%             | 98.15%             | 87.30%      | 77.46%         | 1.48       |
| N14  | 91.57%             | 98.49%             | 87.89%      | 78.40%         | 1.20       |
| N15  | 90.29%             | 98.40%             | 86.77%      | 76.63%         | 5.98       |
| N16  | 6.31%              | 93.76%             | 7.17%       | 3.72%          | 9.45       |
| N17  | 14.82%             | 85.51%             | 10.71%      | 5.66%          | 9.48       |
| N18  | 30.40%             | 72.32%             | 13.85%      | 7.44%          | 9.50       |
| N19  | 92.89%             | 98.31%             | 87.74%      | 78.15%         | 1.16       |
| N20  | 95.15%             | 98.40%             | 89.33%      | 80.71%         | 1.58       |
| N20P | 95.09%             | 98.47%             | 89.65%      | 81.24%         | 1.04       |
