# Supplementary material for: Deep convolutional neural networks for segmenting 3D in vivo multiphoton images of vasculature in Alzheimer disease mouse models
Source: PubMed Central journal article supplement (PMC6415838; doi:10.1371/journal.pone.0213539), 2019-03-13
Supplement: pone.0213539.s006.pdf [file pone.0213539.s006.pdf]

**S3 Table.** The properties of six 3D images not used for training acquired from different mice included in the second independent dataset.

|   | <i>Image Size<br/>(voxel)</i> | <i>Voxel Size<br/>(<math>\mu\text{m}^3</math>)</i> | <i>Z evaluation<br/>interval</i> | <i>Background</i> | <i>Trans gene</i> | <i>Phenotype</i> |
|---|-------------------------------|----------------------------------------------------|----------------------------------|-------------------|-------------------|------------------|
| 1 | $256 \times 256 \times 100$   | $1.14 \times 1.14 \times 1$                        | $1 \mu\text{m}$                  | C57/BL6           | APP/PS1           | AD               |
| 2 | $256 \times 256 \times 250$   | $0.95 \times 0.95 \times 1$                        | $25 \mu\text{m}$                 | C57/BL6           | APP/PS1           | WT               |
| 3 | $256 \times 256 \times 25$    | $0.95 \times 0.95 \times 1$                        | $1 \mu\text{m}$                  | C57/BL6           | APP/PS1           | WT               |
| 4 | $256 \times 256 \times 25$    | $0.95 \times 0.95 \times 1$                        | $1 \mu\text{m}$                  | C57/BL6           | APP/PS1           | WT               |
| 5 | $256 \times 256 \times 25$    | $0.95 \times 0.95 \times 1$                        | $1 \mu\text{m}$                  | C57/BL6           | APP/PS1           | WT               |
| 6 | $256 \times 256 \times 25$    | $0.95 \times 0.95 \times 1$                        | $1 \mu\text{m}$                  | C57/BL6           | APP/PS1           | WT               |
