# Supplementary material for: Deep convolutional neural networks for segmenting 3D in vivo multiphoton images of vasculature in Alzheimer disease mouse models
Source: PubMed Central journal article supplement (PMC6415838; doi:10.1371/journal.pone.0213539), 2019-03-13
Supplement: pone.0213539.s007.pdf [file pone.0213539.s007.pdf]

S4 Table. The results of *DeepVess* and the state-of-the-art methods on the second independent dataset from subjects not used for the model training (S3 Table). *DeepVess* surpass both of them in terms of sensitivity, Dice index, Jaccard index, and boundary modified Hausdorff distance (MHD).

|                 | <i>Sensitivity</i> | <i>Specificity</i> | <i>Dice</i>  | <i>Jaccard</i> | <i>MHD</i>  |
|-----------------|--------------------|--------------------|--------------|----------------|-------------|
| Teikari et al.  | 67.7%              | 99.3%              | 74.9%        | 60.6%          | 1.73        |
| 3D U-Net        | 72.4%              | 99.3%              | 78.5%        | 64.9%          | 1.45        |
| <i>DeepVess</i> | <b>85.5%</b>       | 98.7%              | <b>83.5%</b> | <b>71.8%</b>   | <b>1.41</b> |
